# Supplementary material for: Oxygen activation and CO oxidation over size-selected Ptn/alumina/Re(0001) model catalysts: correlations with valence electronic structure, physical structure, and binding sites
Source: Royal Society of Chemistry journal article supplement (doi:10.1039/c4cp02083a), 2014-06-16
Supplement: c4cp02083a5.pdf [file c4cp02083a5.pdf]

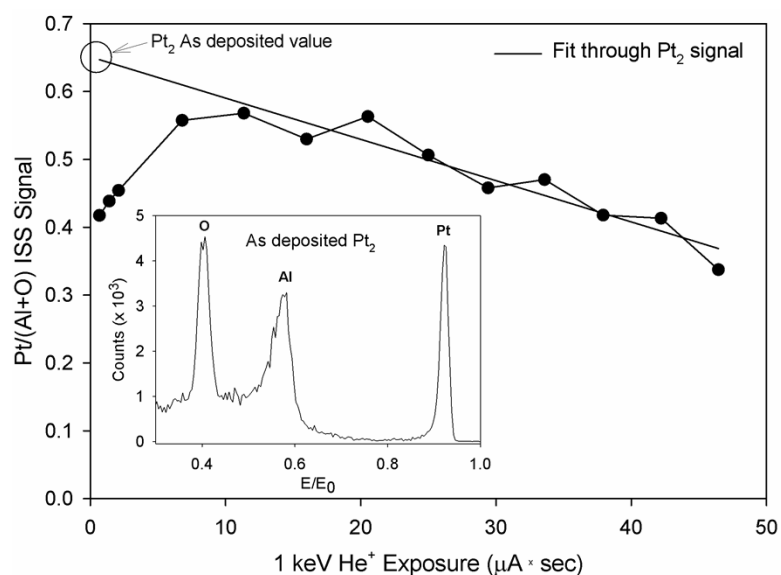

Fig. S1 A series of 3 “low flux” ISS spectra followed by 10 “high flux” ISS spectra were performed to determine the Pt/(Al+O) intensity as a function of 1 keV He<sup>+</sup> exposure for the as deposited Pt<sub>2</sub> model catalyst. The fit passes through the down-sloping signal only in order to extrapolate back to 0 He<sup>+</sup> exposure which determines the as deposited value for each cluster size. The inset shows an example of a “high flux” ISS spectrum.

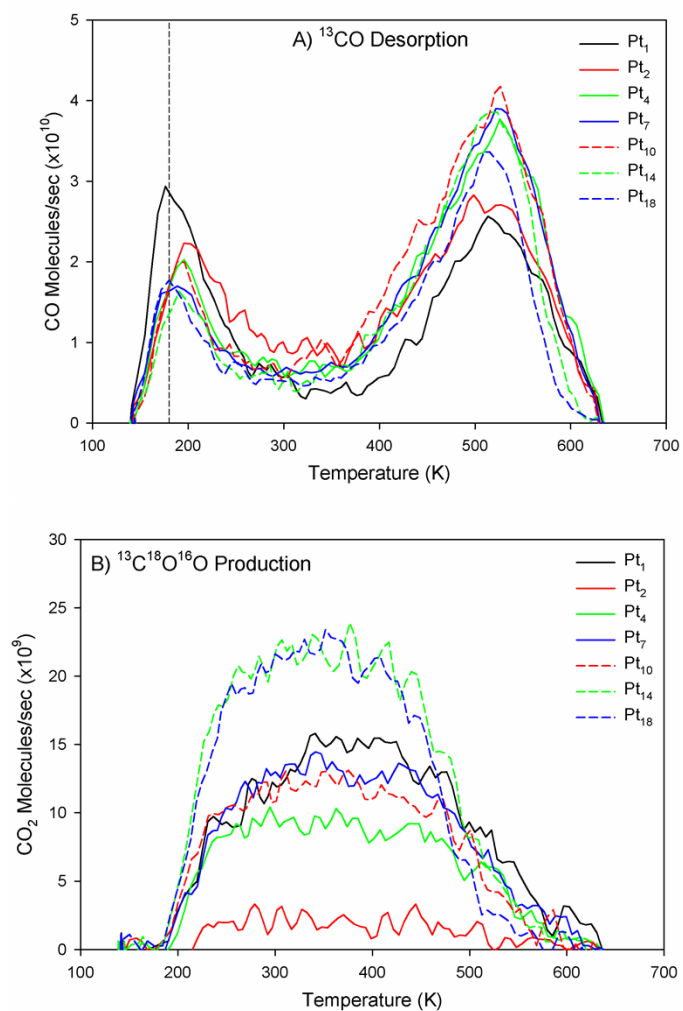

Fig. S2  $^{13}\text{CO}$  desorption (a) and  $^{13}\text{C}^{18}\text{O}^{16}\text{O}$  production (b) as a function of cluster size for 180 K oxidation. Notice the strong size dependence for  $\text{CO}_2$  formation. The dashed line indicates the CO dose temperature (180 K).

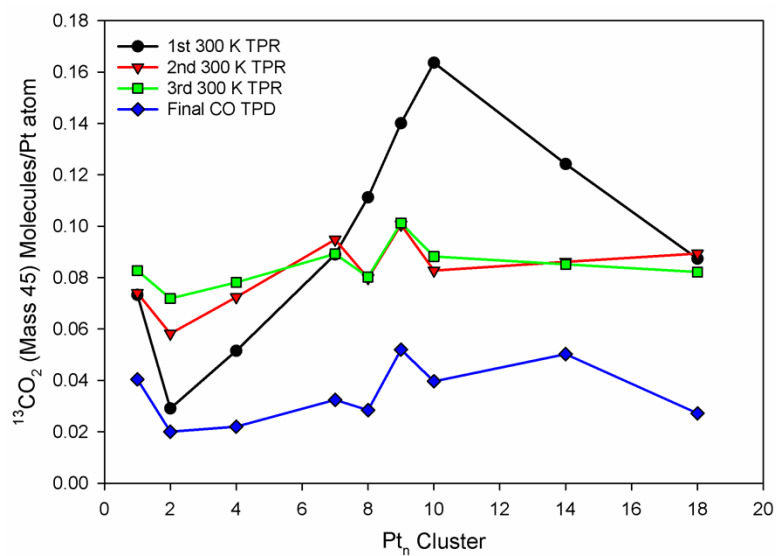

Fig. S3 The integrated  $^{13}\text{CO}_2$  signal during 3 TPRs ( $T_{\text{oxidation}} = 300\text{ K}$ ) and a final CO TPD. Notice the trend is very similar for the main product channel of  $^{13}\text{C}^{18}\text{O}^{16}\text{O}$  (mass 47), even for the final CO TPD, suggesting mass 45 is indeed  $^{13}\text{CO}_2$  production.

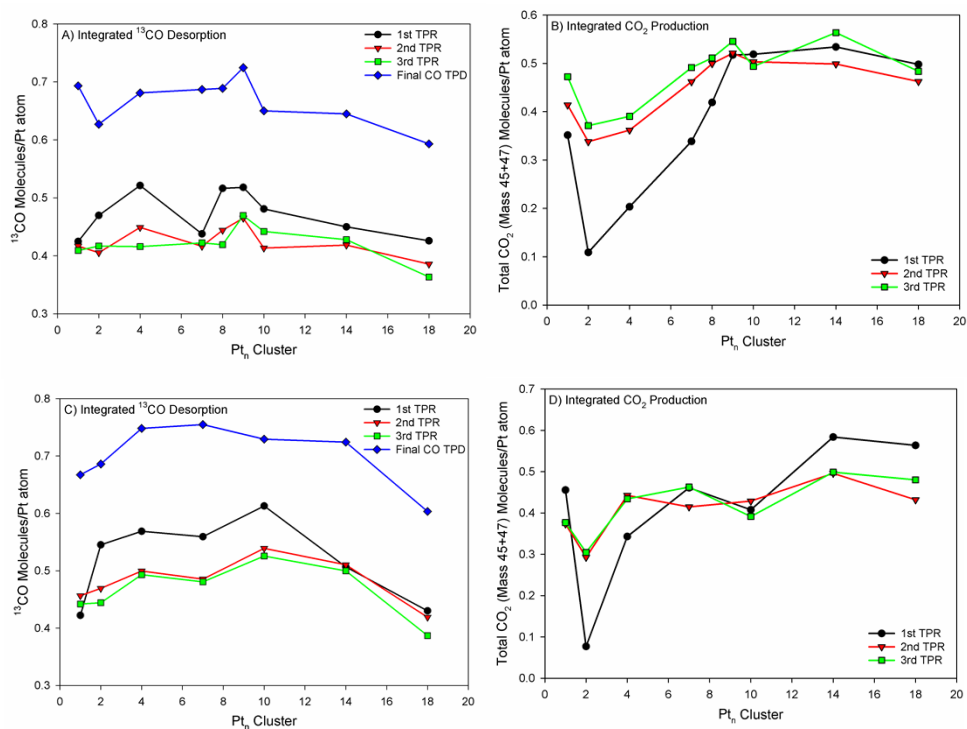

Fig. S4 The main text shows the integrated CO and CO<sub>2</sub> desorption as an average of the 180 K and 300 K oxidation TPR experiments. Here they are shown separately with CO and CO<sub>2</sub> shown for 300 K in (a) and (b) respectively. 180 K oxidation is shown in (c) and (d).

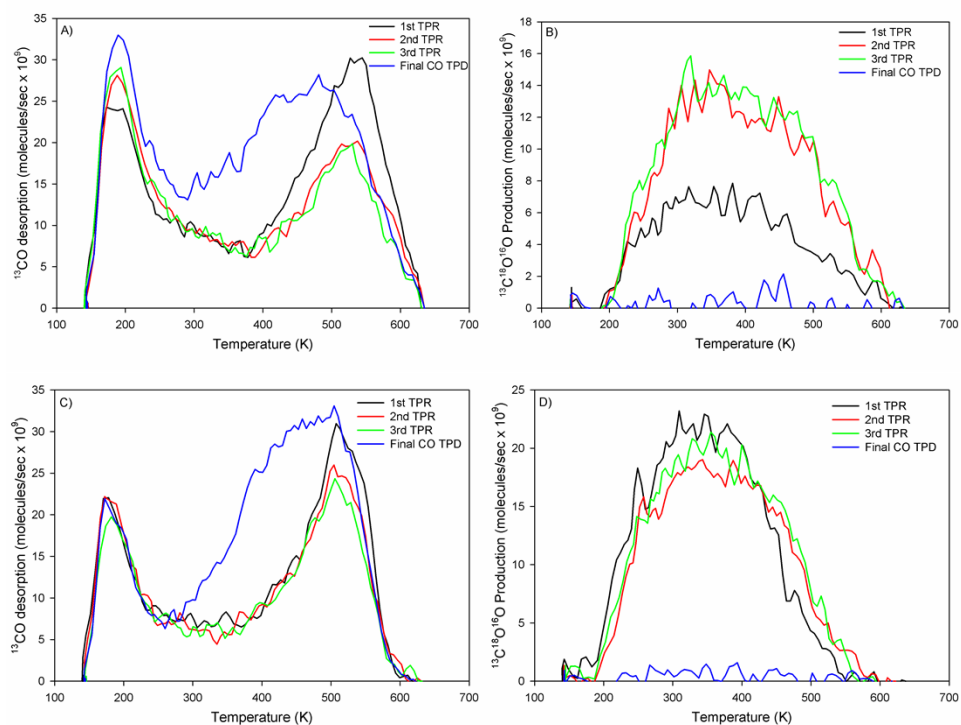

Fig. S5 A series of 3 TPRs followed by a final CO TPD was performed for each cluster size studied. Here are the CO and CO<sub>2</sub> desorption for Pt4 (a,b) and Pt18 (c,d) respectively.
