# Supplementary figures and images for: Oxygen activation and CO oxidation over size-selected Ptn/alumina/Re(0001) model catalysts: correlations with valence electronic structure, physical structure, and binding sites
Source: Royal Society of Chemistry journal article supplement (doi:10.1039/c4cp02083a), 2014-06-16

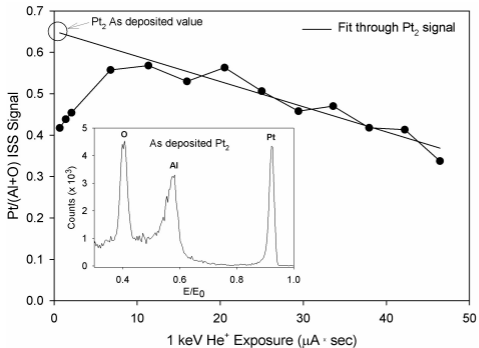

Supplement: c4cp02083a1.pdf [file c4cp02083a1.pdf]

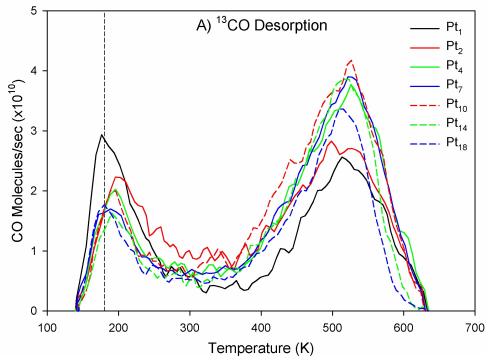

Supplement: c4cp02083a2.pdf [file c4cp02083a2.pdf]

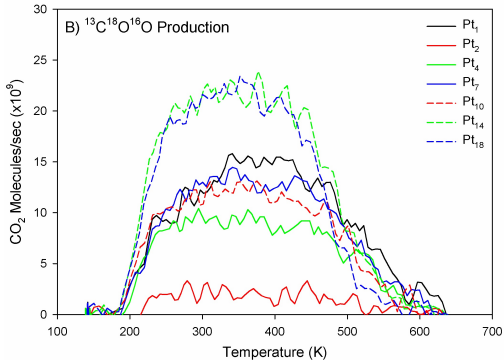

Supplement: c4cp02083a3.pdf [file c4cp02083a3.pdf]
